# Supplementary material for: Fucoidan and Fucosylated Chondroitin Sulfate Stimulate Hematopoiesis in Cyclophosphamide-Induced Mice
Source: PubMed Central journal article supplement (PMC5666409; doi:10.3390/md15100301), 2017-09-30
Supplement: marinedrugs-15-00301-s001.pdf [file marinedrugs-15-00301-s001.pdf]

**Table S1.** Comparative analysis of hematological parameters in groups of mice after treatment of CPh with G-CSF, **PS-Fuc**, **PS-FCS**

| Parameters                    |               | Groups          |                |                |        |         |
|-------------------------------|---------------|-----------------|----------------|----------------|--------|---------|
|                               |               | CPh+r G-<br>CSF | CPh+PS-<br>Fuc | CPh+PS-<br>FCS | CPh    | Control |
| <b>WBCs</b>                   | p, vs CPh     | 0.008*          | 0.001*         | 0.041*         | -      | 0.001*  |
|                               | p, vs r G-CSF | -               | 0.345          | 0.741          | 0.008* | 0.007*  |
|                               | p, vs Control | 0.007           | 0.001*         | 0.085          | 0.000  | -       |
| <b>Neutrophils,<br/>cells</b> | p, vs CPh     | 0.010*          | 0.004*         | 0.010*         | -      | 0.001*  |
|                               | p, vs r G-CSF | -               | 0.301          | 0.515          | 0.010* | 0.418   |
|                               | p, vs Control | 0.418           | 0.014*         | 0.087          | 0.000  | -       |
| <b>Neutrophils,<br/>%</b>     | p, vs CPh     | 0.068           | 0.068          | 0.067          | -      | 0.068   |
|                               | p, vs r G-CSF | -               | 0.698          | 1.000          | 0.069  | 0.171   |
|                               | p, vs Control | 0.171           | 0.648          | 1.000          | 0.068  | -       |
| <b>RBC</b>                    | p, vs CPh     | 0.072           | 0.052          | 0.073          | -      | 0.105   |
|                               | p, vs r G-CSF | -               | 0.536          | 0.724          | 0.072  | 0.226   |
|                               | p, vs Control | 0.226           | 0.001*         | 0.002*         | 0.105  | -       |
| <b>Platelets</b>              | p, vs CPh     | 0.211           | 0.136          | 0.091          | -      | 0.521   |
|                               | p, vs r G-CSF | -               | 0.457          | 0.140          | 0.211  | 0.063   |
|                               | p, vs Control | 0.063           | 0.025*         | 0.001*         | 0.521  | -       |
| <b>Hemoglobin</b>             | p, vs CPh     | 0.066           | 0.054          | 0.073          | -      | 0.085   |
|                               | p, vs r G-CSF | -               | 0.829          | 0.529          | 0.066  | 0.328   |
|                               | p, vs Control | 0.328           | 0.003*         | 0.154          | 0.085  | -       |

p<0.05
